# Supplementary material for: Ginsenoside Rg1 protects starving H9c2 cells by dissociation of Bcl-2-Beclin1 complex
Source: PubMed Central journal article supplement (PMC4881172; doi:10.1186/s12906-016-1112-2), 2016-05-26

Fig. S1

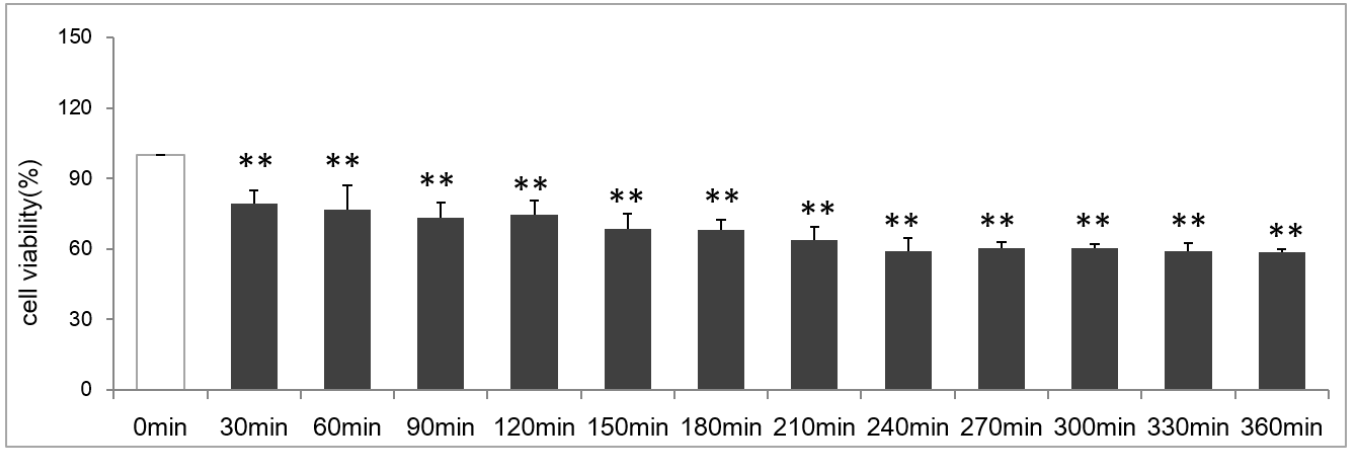

M

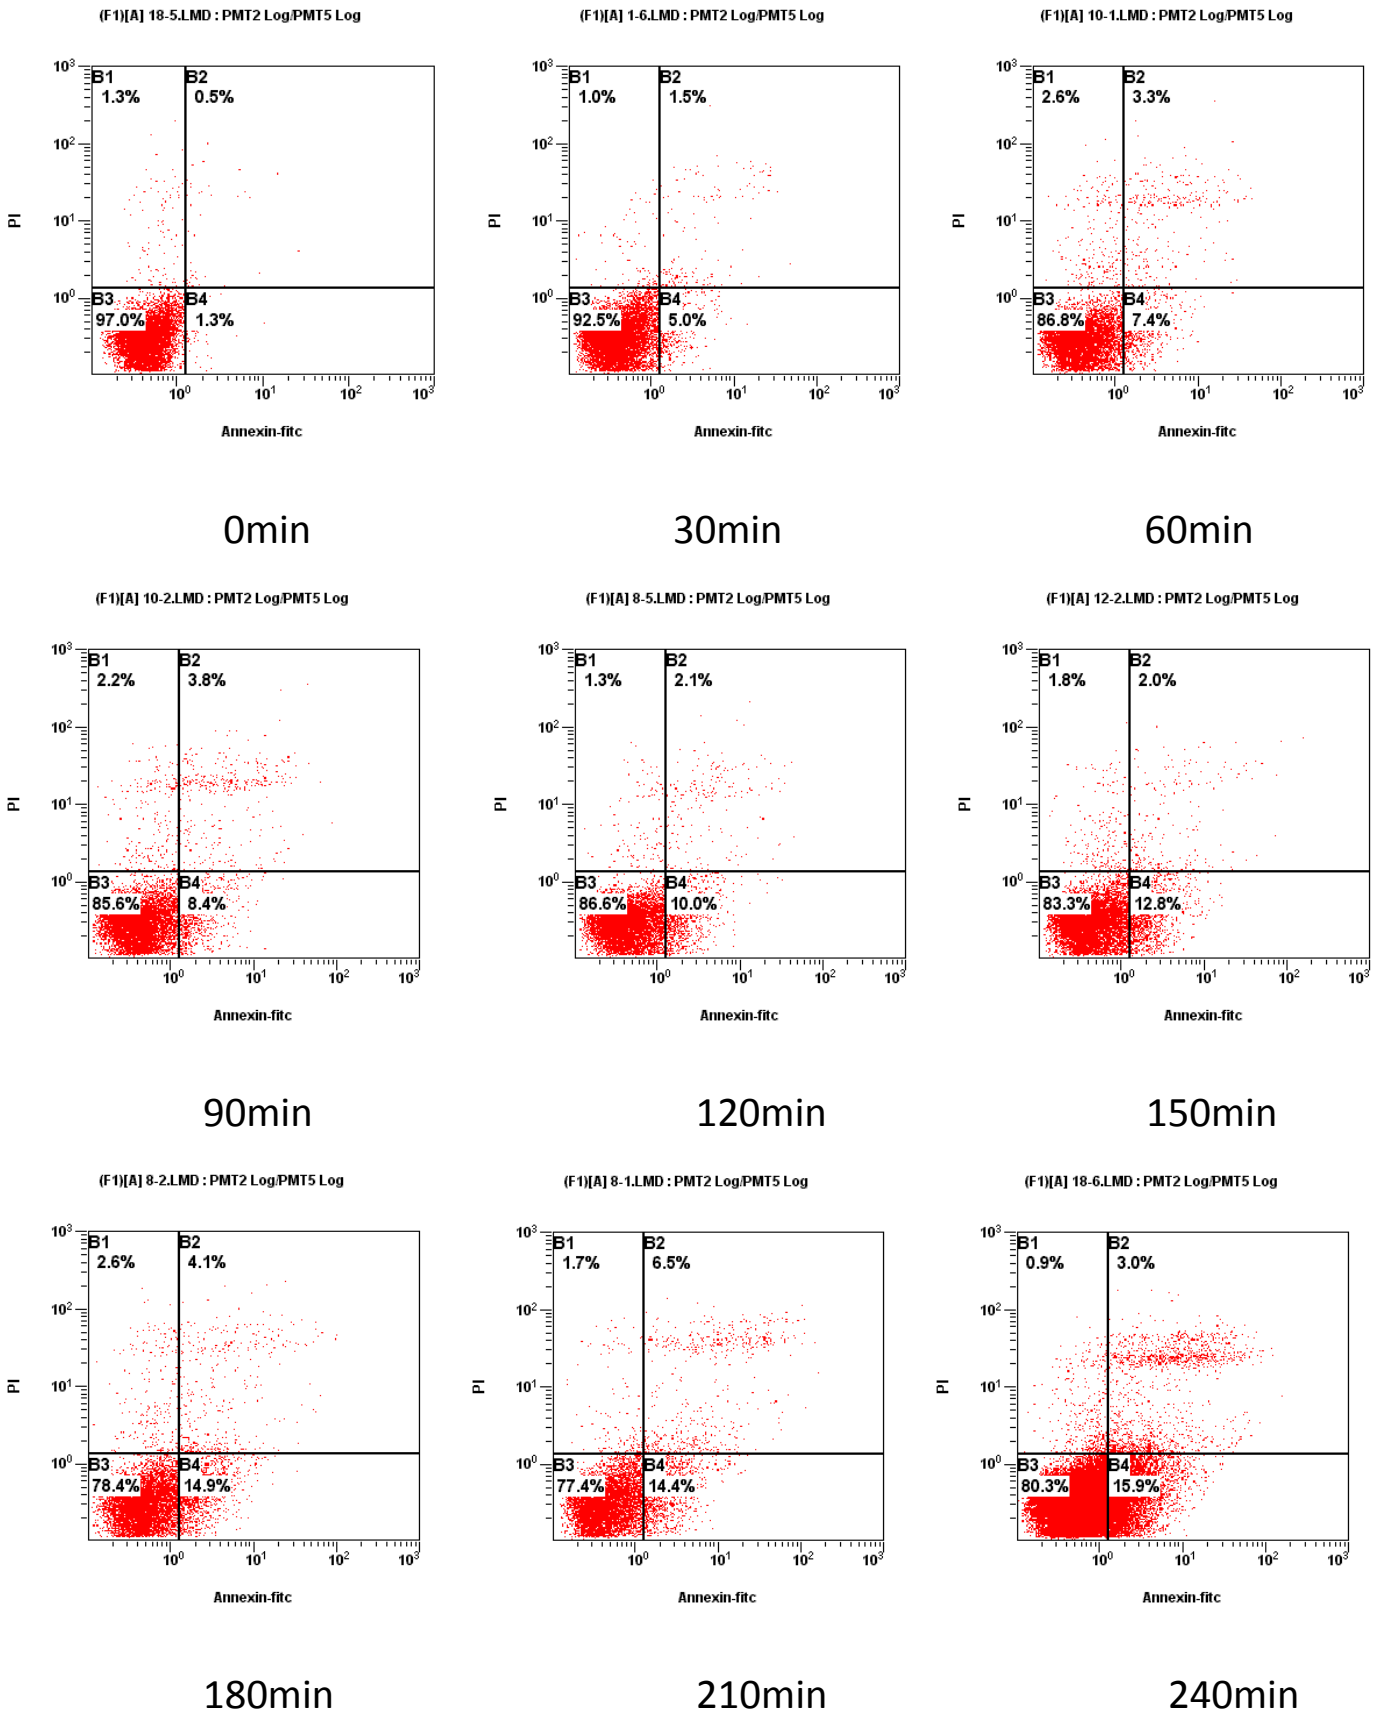

# Rg1

(F1)[A] Q12-6.LMD : PMT2 Log/PMT5 Log

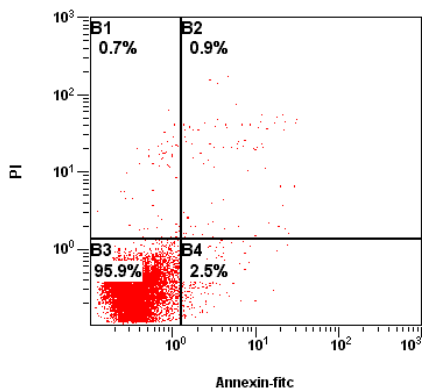

0min

(F1)[A] 1-2.LMD : PMT2 Log/PMT5 Log

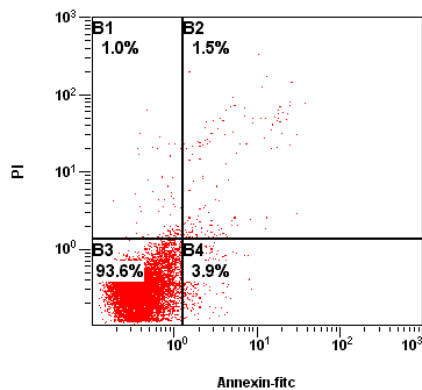

30min

(F1)[A] 1-6.LMD : PMT2 Log/PMT5 Log

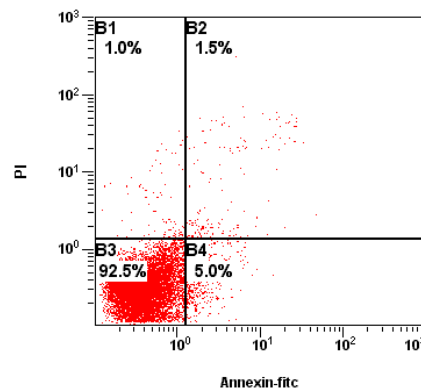

60min

(F1)[A] 13-1.LMD : PMT2 Log/PMT5 Log

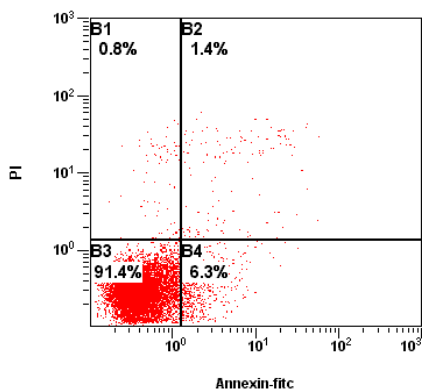

90min

(F1)[A] 1-5.LMD : PMT2 Log/PMT5 Log

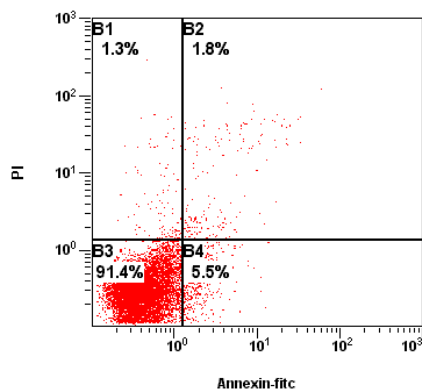

120min

(F1)[A] 3-1.LMD : PMT2 Log/PMT5 Log

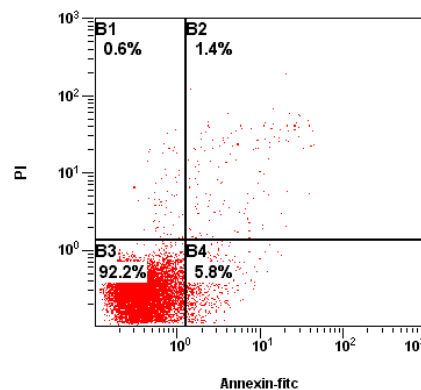

150min

(F1)[A] 10-5.LMD : PMT2 Log/PMT5 Log

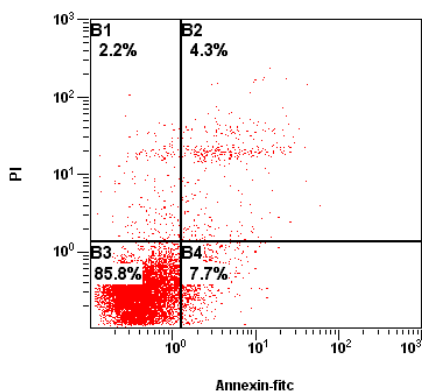

180min

(F1)[A] 2-1.LMD : PMT2 Log/PMT5 Log

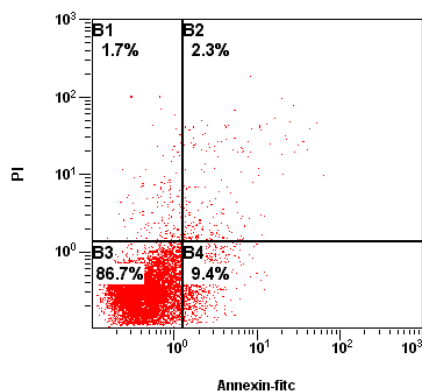

210min

(F1)[A] 12-1.LMD : PMT2 Log/PMT5 Log

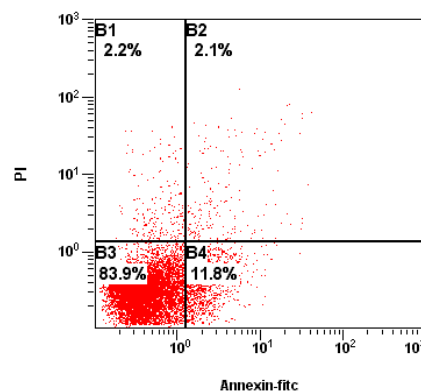

240min

Fig. S3

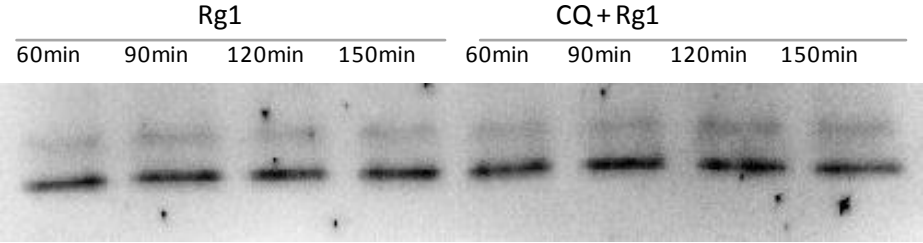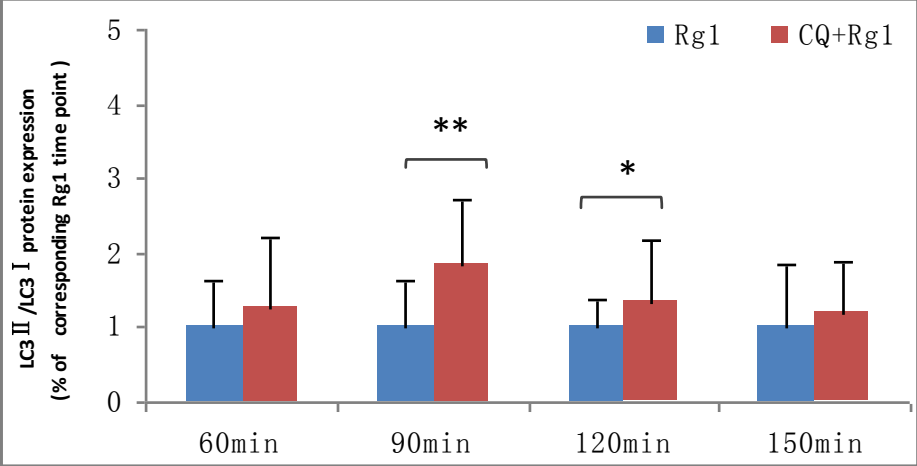

Fig. S4

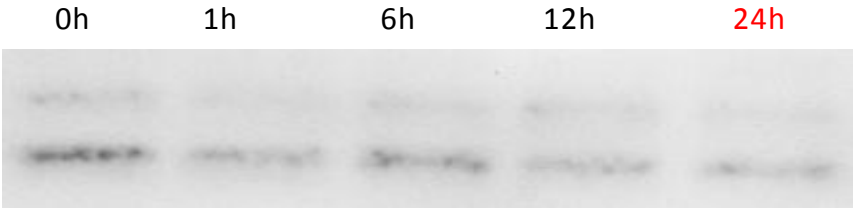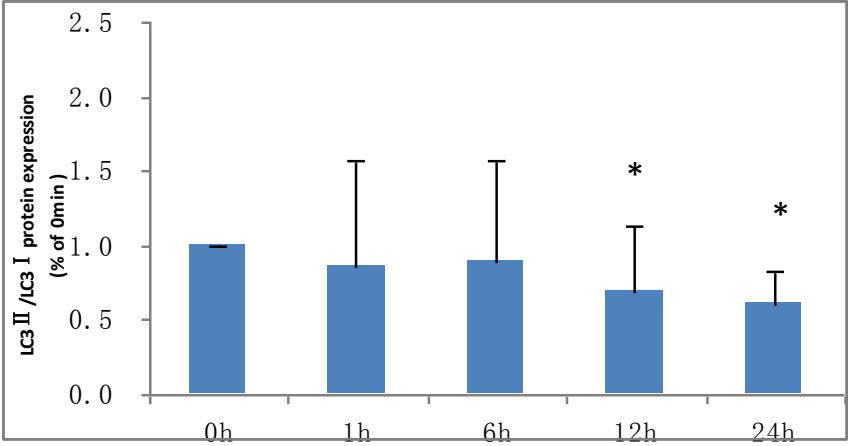

Fig. S5

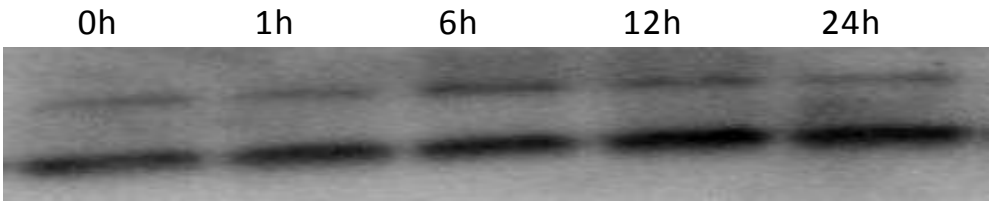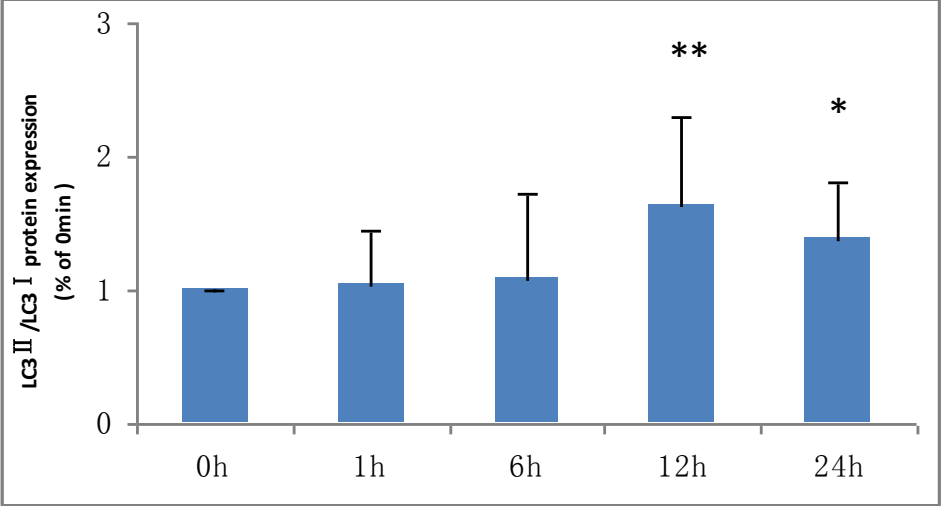

Supplement: 12906_2016_1112_MOESM1_ESM.pdf [file 12906_2016_1112_MOESM1_ESM.pdf]
